# Supplementary material
Source: PubMed Central journal article supplement (PMC9992315)
Supplement: NIHMS1866091-supplement-1.pdf [file NIHMS1866091-supplement-1.pdf]

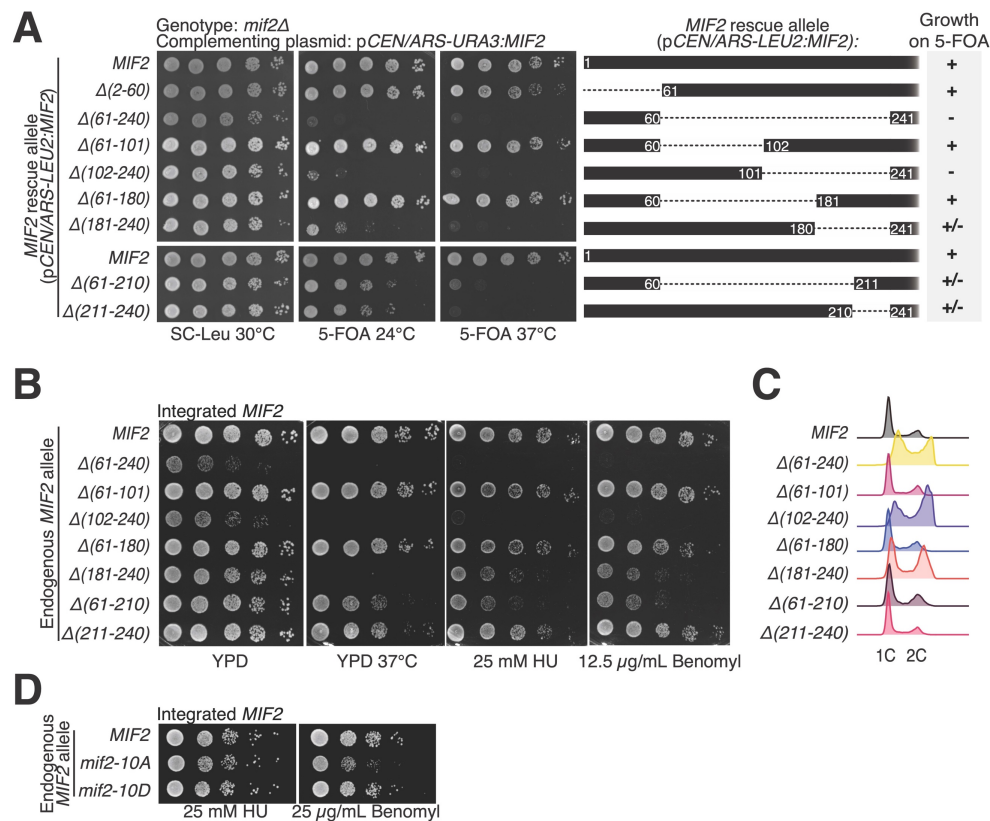

**Figure S1 – Deletion analysis of the Mif2-PEST region and phenotypic analysis of associated mutants. Related to Figure 1.**

(A) Plasmid-shuffling assay to test the complementation ability of *MIF2* alleles. The chromosomal genotype of the strain was *mif2Δ*. Rescue and test plasmids were *pRS316-MIF2::URA* and *pRS315-mif2::LEU2*, respectively. Numbers correspond to deleted amino acid residues. The diagram at right shows Mif2 residues 1-241 with deleted segments drawn as a dotted line. Viability upon ejection of the *MIF2* rescue plasmid on 5-FOA is shown in the panel at right (+ – growth; - – no growth; +/- – intermediate growth phenotype). (B) Growth analysis for strains carrying the indicated *MIF2* alleles integrated into the endogenous *MIF2* locus. Stress conditions are indicated beneath images. (C) FACS analysis of *MIF2* mutants (asynchronous cultures). (D) Measurement of *MIF2* growth phenotypes upon exposure to HU and benomyl. See Figure 1D for related growth assays. *MIF2*, *mif2-10A*, or *mif2-10D* replaced endogenous *MIF2*.

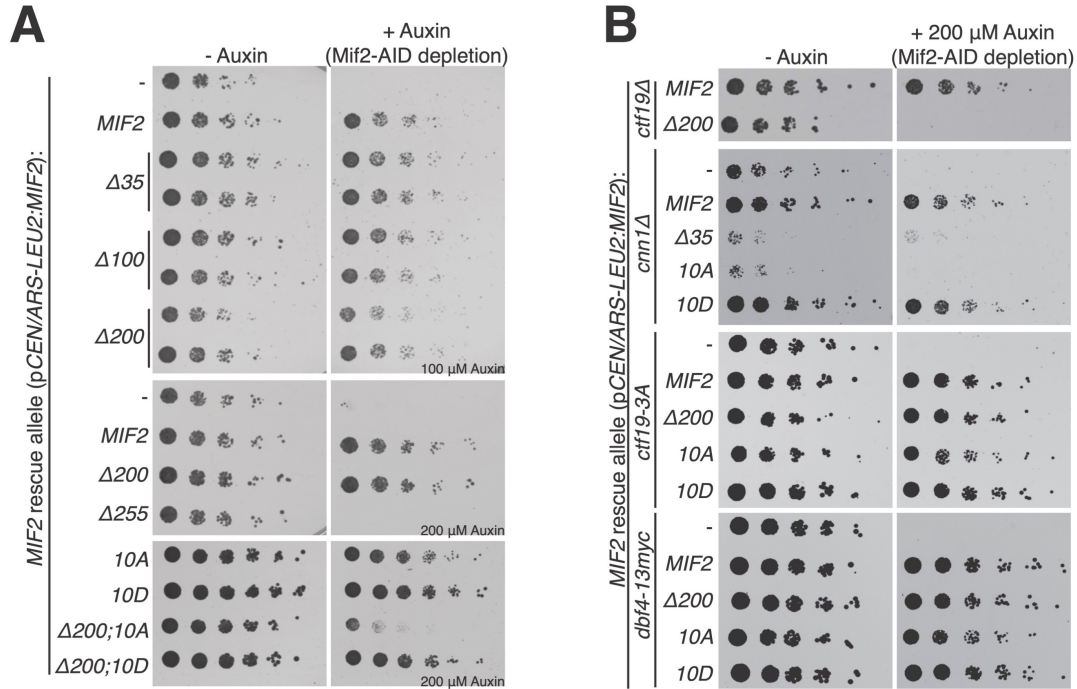

**Figure S2 – Mif2 genetic complementation tests and analysis of associated mutants. Related to Figure 1.**

(A) Endogenous Mif2 was depleted by auxin treatment, and the indicated *MIF2* alleles were supplied on a centromeric plasmid coding for *MIF2* and ~500 bp flanking chromosomal DNA (pCEN/ARS-LEU2 *MIF2*). These data are summarized in Figure 1A. (B) Complementation analysis as in panel A. The test strain carried *MIF2-AID*, the indicated deletions or mutations shown at left (*ctf19Δ*, *cnn1Δ*, *ctf19-3A*, or *dbf3-13myc*), and complementing *MIF2* carried on the same plasmid used for panel A. *ctf19-3A* disrupts centromeric cohesin recruitment. *dbf4-13myc* inactivates early centromere replication. These data are summarized in Figure 1A.

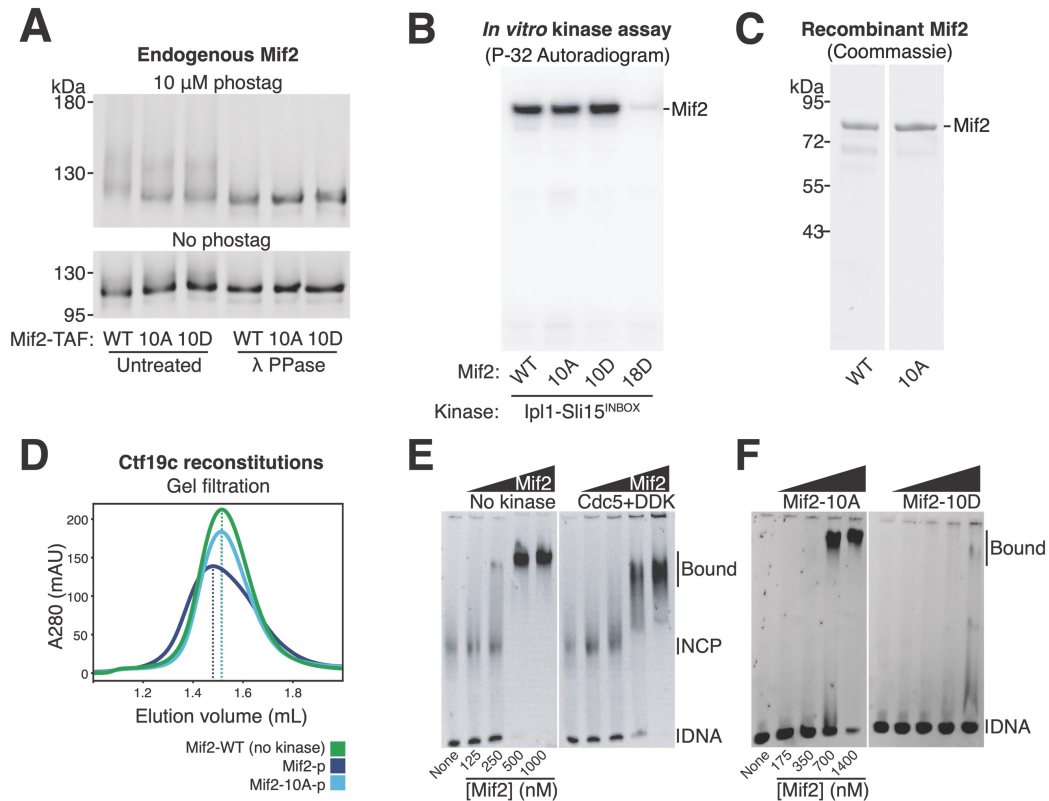

**Figure S3 – Further analysis of Mif2 phosphorylation and its biochemical consequence. Related to Figures 1, 2, and 3.**

(A) Endogenous Mif2-TAF proteins were immunopurified from asynchronous cultures before incubation with phosphatase buffer (Untreated; left) or lambda phosphatase ( $\lambda$  PPase; right). Reaction products were resolved by SDS-PAGE with 10  $\mu$ M (top) or 0  $\mu$ M (bottom) Phos-tag acrylamide. Anti-protein A Western blot is shown. (B) Purified full length Mif2-WT, -10A, -10D, or -18D was phosphorylated with recombinant Ipl1. In addition to the 10D substitutions, Mif2-18D has: S53D, S54D, S97D, S98D, S150D, T151D, S154D, T288D. These were identified in MS experiments (Figure 2C). (C) Coomassie-stained gel showing purified Mif2 protein samples used for the experiment shown in in Figure 2B. (D) UV absorbance curves also shown in Figure 3 and stacked here for direct comparison. In all experiments, Ctf19c, Mif2, and the Cse4 nucleosome were mixed according to the schematics in Figure 3. The figure shows the elution profiles for the following complexes: green –Mif2-WT-Cse4 nucleosome complex with Ctf19c; dark blue – phosphorylated Mif2-WT-Cse4 nucleosome complex with Ctf19c; light blue – phosphorylated Mif2-10A-Cse4 nucleosome complex with Ctf19c. The vertical dotted lines mark the peak maxima. (E) EMSA showing the interaction between Mif2 and the Cse4 nucleosome. Monomeric Mif2 concentrations are listed below. Mif2 was incubated with ATP (left) or ATP and the indicated kinases (left) before mixing with nucleosome particles. (F) EMSA experiment showing the interaction of the indicated Mif2 proteins with 601 DNA.

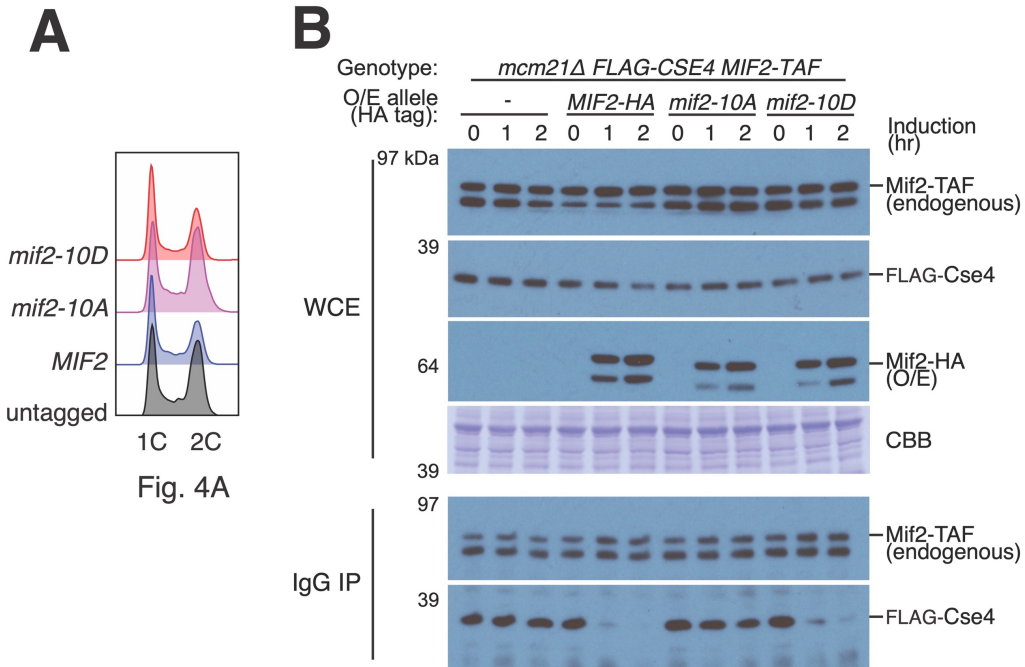

**Figure S4 – Overexpressed Mif2-10A failed to compete against endogenous Mif2 in binding Cse4 in cells lacking Mcm21, indicating that the defect of *mif2-10A* is independent of Mcm21. Related to Figure 4.**

(A) Cell cycle analysis for cultures used in Figure 4A. Plot show DNA content for asynchronous cultures from the indicated strains. (B) Mif2 competition pulldown experiments were performed as in Figure 4D. The strain genotype was as indicated (*mcm21Δ FLAG-CSE4 MIF2-TAF*). The indicated extragenic *MIF2* alleles were overexpressed.

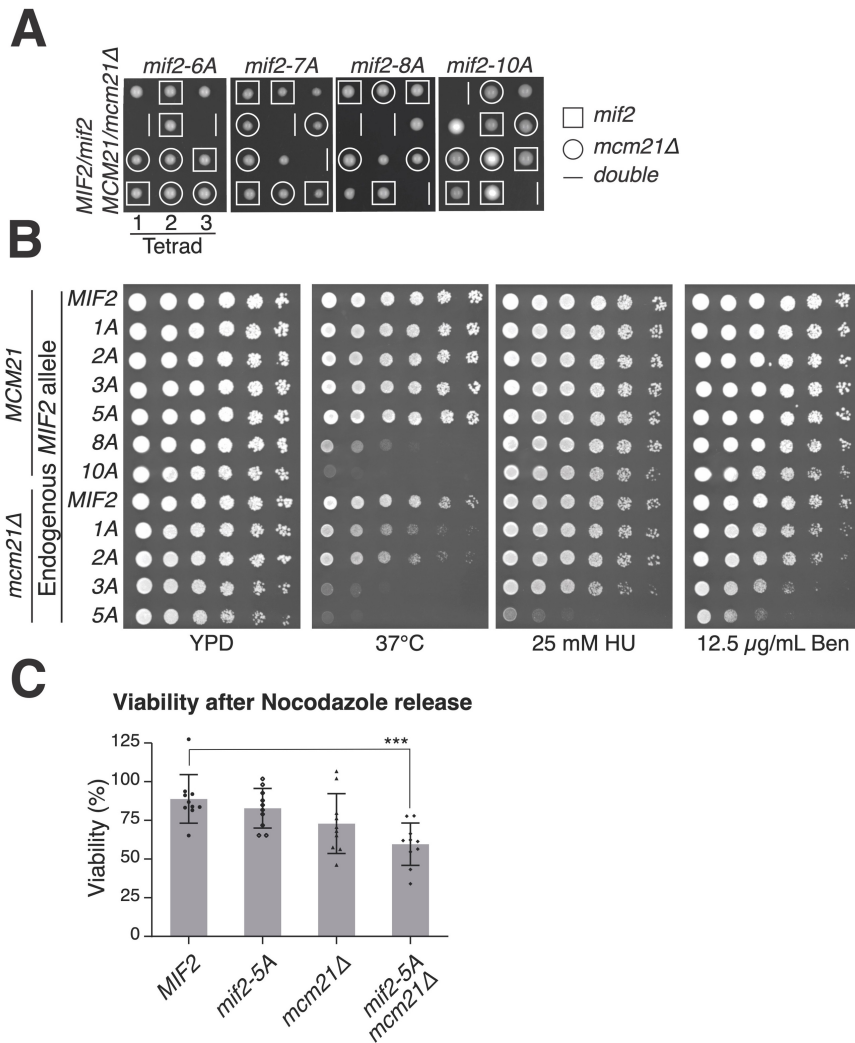

**Figure S5 – Viability of *mif2* and *mcm21* mutant cells. Related to Figure 5.**

(A) Synthetic lethality of the indicated *MIF2* alleles with *mcm21Δ* was assessed by sporulation. Meiotic products of heterozygous diploid strains (*MCM21/mcm21Δ MIF2/mif2-6A*, *-7A*, *-8A*, or *-10A*) are shown. (B) Sensitivity to heat stress (37 °C), replication stress (HU), or spindle stress (Ben) upon successive inactivation of Mif2-PEST phosphorylation sites in *MCM21* or *mcm21Δ* strains. The indicated *MIF2* alleles were integrated at the *MIF2* chromosomal locus. *mif2-8A* and *-10A* were not tested in *mcm21Δ* cells due to synthetic lethality. Figure 5B shows the positions of the mutations. (C) *mif2-5A mcm21Δ* cells show decreased viability upon release from a nocodazole arrest.

| <b>Plasmid</b> | <b>Description</b>                                                              |
|----------------|---------------------------------------------------------------------------------|
| pSMH1409       | pRS315 <i>MIF2</i> (chrXI:272,891-275,577)                                      |
| pSMH1474       | pRS315 <i>mif2-Δ35</i>                                                          |
| pSMH1476       | pRS315 <i>mif2-Δ100</i>                                                         |
| pSMH1468       | pRS315 <i>mif2-Δ200</i>                                                         |
| pSMH1486       | pRS315 <i>mif2-Δ256</i>                                                         |
| pSMH1869       | pRS315 <i>mif2-14A</i>                                                          |
| pSMH1870       | pRS315 <i>mif2-14D</i>                                                          |
| pSMH1495       | pRS315 <i>mif2-10A</i>                                                          |
| pSMH1496       | pRS315 <i>mif2-10D</i>                                                          |
| pSMH1867       | pRS315 <i>mif2-4A</i>                                                           |
| pSMH1868       | pRS315 <i>mif2-4D</i>                                                           |
| pSMH1497       | pRS315 <i>mif2-Δ200;10A</i>                                                     |
| pSMH1498       | pRS315 <i>mif2-Δ200;10D</i>                                                     |
| pSMH1684       | pFastBac (438-B) 6xHis-Dbf4; 6xHis-Cdc7-AS3                                     |
| pSMH1104       | pLIC-Tra 6xHis-MBP-Cdc5                                                         |
| pSMH1320       | pLIC-Tra 6xHis-Sli15-580-698; 6xHis-Ipl1-AS6                                    |
| pSMH1172       | pFastBac 6xHis-FLAG-Mif2                                                        |
| pSMH1864       | pFastBac 6xHis-FLAG-Mif2-10A                                                    |
| pSMH1501       | pFastBac 6xHis-FLAG-Mif2-10D                                                    |
| pSMH104        | pLIC-Tra 6xHis-TEV-ChI4; 6xHis-TEV-Iml3 (Hinshaw and Harrison, 2013)            |
| pSMH1680       | pFastBac (438-B) 6xHis-Ame1; Okp1; 6xHis-Nkp1; Nkp2; 6xHis-Ctf19; Mcm21         |
| pSMH1703       | pFastBac (438-B) 6xHis-Ctf3; Mcm16; Mcm22; 6xHis-Cnn1; Wip1                     |
| pSMH1741       | pLIC-Tra 6xHis-Hhf1 (codon optimized); 6xHis-Hta1; Htb1; Hht1 (Addgene #160930) |
| pSMH1742       | pLIC-Tra 6xHis-Hhf1 (codon optimized); 6xHis-Hta1; Htb1; Cse4 (Addgene #160929) |
| HZE1904        | pRS315- <i>MIF2</i> (chrXI:272980-275333)                                       |
| HZE1905        | pRS316- <i>MIF2</i>                                                             |
| HZE1912        | pRS315- <i>MIF2-TAF::HisMX</i>                                                  |
| HZE1928        | pRS315- <i>mif2-(2-60del)-TAF::HisMX</i>                                        |
| HZE1932        | pRS315- <i>mif2-(61-240del)-TAF::HisMX</i>                                      |
| HZE1933        | pRS315- <i>mif2-(61-101del)-TAF::HisMX</i>                                      |

|         |                                                                                                                 |
|---------|-----------------------------------------------------------------------------------------------------------------|
| HZE1934 | pRS315- <i>mif2</i> -(102-240del)-TAF::HisMX                                                                    |
| HZE1936 | pRS315- <i>mif2</i> -(181-240del)-TAF::HisMX                                                                    |
| HZE1938 | pRS315- <i>mif2</i> -(61-180del)-TAF::HisMX                                                                     |
| HZE1939 | pRS315- <i>mif2</i> -(61-210del)-TAF::HisMX                                                                     |
| HZE1940 | pRS315- <i>mif2</i> -(211-240del)-TAF::HisMX                                                                    |
| HZE2941 | pRS315- <i>mif2</i> -10A-TAF::HisMX, 10A (S217A, S226A, S228A, S229A, S232A, S234A, S236A, S238A, S240A, T245A) |
| HZE2942 | pRS315- <i>mif2</i> -10D-TAF::HisMX, 10D (S217D, S226D, S228D, S229D, S232D, S234D, S236D, S238D, S240D, T245D) |
| HZY1569 | pRS425-GAL1-10                                                                                                  |
| HZY1924 | pRS425-GAL1-10- <i>Mif2</i> -6xHIS-3xHA                                                                         |
| HZY2979 | pRS425-GAL1-10- <i>mif2</i> -10A-6xHIS-3xHA                                                                     |
| HZE3048 | pRS315- <i>mif2</i> -S217A-TAF::HisMX                                                                           |
| HZE3049 | pRS315- <i>mif2</i> -3SA(S226A, S228A and S229A)-TAF::HisMX                                                     |
| HZE3050 | pRS315- <i>mif2</i> -T245A-TAF::HisMX                                                                           |
| HZE3067 | pRS315- <i>mif2</i> -S226A-TAF::HisMX                                                                           |
| HZE3068 | pRS315- <i>mif2</i> -2SA(S228A and S229A)-TAF::HisMX                                                            |
| HZE3069 | pRS315- <i>mif2</i> -5SA(S232A, S234A, S236A, S238A, S240A)-TAF::HisMX                                          |
| HZE3070 | pRS315- <i>mif2</i> -8SA(S226A, S228A, S229A, S232A, S234A, S236A, S238A, S240A)-TAF::HisMX                     |
| HZE3153 | pRS315- <i>mif2</i> -6SA(S226A, S232A, S234A, S236A, S238A, S240A)-TAF::HisMX                                   |
| HZE2154 | pRS315- <i>mif2</i> -7SA(S228A, S229A, S232A, S234A, S236A, S238A, S240A)-TAF::HisMX                            |

**Table S1 – Plasmids used in this work.**

| Strain Number | Genotype                                                                         | Figure/Source |
|---------------|----------------------------------------------------------------------------------|---------------|
| AM7579        | W303 <i>MATa ura3::pADH1-OsTIR1-9MYC::URA3</i>                                   | Adèle Marston |
| SMH614        | <i>MATa ura3::pADH1-OsTIR1-9MYC::URA3 MIF2-3xHA-IAA7::KanMX</i>                  | Fig. 1, S1    |
| SMH619        | <i>MATa ura3::pADH1-OsTIR1-9MYC::URA3 MIF2-3xHA-IAA7::KanMX ctf19Δ::HISMX</i>    | Fig. 1, S1    |
| SMH629        | <i>MATa ura3::pADH1-OsTIR1-9MYC::URA3 MIF2-3xHA-IAA7::KanMX cnn1Δ::HISMX</i>     | Fig. 1, S1    |
| SMH625        | <i>MATa ura3::pADH1-OsTIR1-9MYC::URA3 MIF2-3xHA-IAA7::KanMX ctf19-3A::HISMX</i>  | Fig. 1, S1    |
| SMH833        | <i>MATa ura3::pADH1-OsTIR1-9MYC::URA3 MIF2-3xHA-IAA7::KanMX dbf4-18myc::TRP1</i> | Fig. 1, S1    |
| HZY366        | W303 <i>MATa mif2Δ::NAT pRS316-MIF2</i>                                          | Fig. 1C, S1   |
| HZY1247       | W303 <i>MATa mcm21Δ::KanMX mif2Δ::NAT pRS316-MIF2/MCM21</i>                      | Fig. 1C       |
| HZY1616       | S288c <i>MATa bar1Δ::URA3 sml1Δ::TRP1</i>                                        | Fig. 1D, S1   |
| HZY1681       | S288c <i>MATa mif2-10A-TAF::HisMX bar1Δ::URA3 sml1Δ::TRP1</i>                    | Fig. 1D, S1   |
| HZY1682       | S288c <i>MATa mif2-10D-TAF::HisMX bar1Δ::URA3 sml1Δ::TRP1</i>                    | Fig. 1D, S1   |
| HZY3490       | S288c <i>MATa MIF2-TAF::HisMX sml1Δ::TRP1</i>                                    | Fig. S1       |
| HZY3499       | S288c <i>MATa mif2-2-60del-TAF::HisMX sml1Δ::TRP1</i>                            | Fig. S1       |
| HZY3504       | S288c <i>MATa mif2-61-240del-TAF::HisMX sml1Δ::TRP1</i>                          | Fig. S1       |
| HZY3507       | S288c <i>MATa mif2-61-101del-TAF::HisMX sml1Δ::TRP1</i>                          | Fig. S1       |
| HZY3526       | S288c <i>MATa mif2-102-240del-TAF::HisMX sml1Δ::TRP1</i>                         | Fig. S1       |



|         |                                                                                      |                  |
|---------|--------------------------------------------------------------------------------------|------------------|
| HZY3514 | S288c MATa <i>mif2-61-180del-TAF::HisMX sml1Δ::TRP1</i>                              | Fig. S1          |
| HZY3522 | S288c MATa <i>mif2-181-240del-TAF::HisMX sml1Δ::TRP1</i>                             | Fig. S1          |
| HZY3537 | S288c MATa <i>mif2-61-210del-TAF::HisMX sml1Δ::TRP1</i>                              | Fig. S1          |
| HZY3538 | S288c MATa <i>mif2-211-240del-TAF::HisMX sml1Δ::TRP1</i>                             | Fig. S1          |
| SCY249  | S288c MATa <i>sml1Δ::TRP1 arg4Δ</i>                                                  | Fig. 4A          |
| HZY1620 | S288c MATa <i>MIF2-TAF::HisMX sml1Δ::TRP1 bar1Δ::URA3</i>                            | Fig. 1E, 4A, S3A |
| HZY1681 | S288c MATa <i>mif2-10A-TAF::HisMX sml1Δ::TRP1 bar1Δ::URA3</i>                        | Fig. 1E, 4A, S3A |
| HZY1682 | S288c MATa <i>mif2-10D-TAF::HisMX sml1Δ::TRP1 bar1Δ::URA3</i>                        | Fig. 1E, 4A, S3A |
| HZY1847 | S288c MATa <i>3xFLAG-CSE4::KanMX MIF2-TAF::HisMX bar1Δ::URA3 sml1Δ::TRP1</i>         | Fig. 4C, 5AC     |
| HZY1849 | S288c MATa <i>3xFLAG-CSE4::KanMX mif2-10A-TAF::HisMX bar1Δ::URA3 sml1Δ::TRP1</i>     | Fig. 4B          |
| HZY1173 | S288c MATa <i>3xFLAG-CSE4::KanMX MIF2-TAF::HisMX mcm21Δ::Hyg bar1Δ::URA3</i>         | Fig. S4B         |
| HZY1685 | W303 MATα <i>LEU2 MIF2-TAF::HisMX</i>                                                | Fig. 5A          |
| HZY1686 | W303 MATα <i>LEU2 mif2-10A-TAF::HisMX</i>                                            | Fig. 5A          |
| HZY1688 | W303 MATα <i>LEU2 mif2-10D-TAF::HisMX</i>                                            | Fig. 5A          |
| HZY850  | W303 MATα <i>LEU2 mcm21Δ::KanMX</i>                                                  | Fig. 5A          |
| HZY1016 | W303 Diploid ( <i>mif2-10A-TAF::HisMX/MIF2 mcm21Δ::Hyg/MCM21 bar1Δ::KanMX/BAR1</i> ) | Fig. S5A         |
| HZY1026 | W303 Diploid ( <i>mif2-8A-TAF::HisMX/MIF2 mcm21Δ::Hyg/MCM21</i> )                    | Fig. S5A         |

|         |                                                                                                                          |                |
|---------|--------------------------------------------------------------------------------------------------------------------------|----------------|
| HZY2078 | W303 Diploid ( <i>mif2-6A-TAF::HisMX/MIF2 mcm21Δ::Hyg/MCM21</i> )                                                        | Fig. S5A       |
| HZY2079 | W303 Diploid ( <i>mif2-7A-TAF::HisMX/MIF2 mcm21Δ::Hyg/MCM21</i> )                                                        | Fig. S5A       |
| HZY1594 | W303 MAT $\alpha$ <i>MIF2-TAF::HisMX</i>                                                                                 | Fig. 5C, S5B-C |
| HZY2227 | W303 MAT $\alpha$ <i>mif2-S217A-TAF::HisMX</i>                                                                           | Fig. S5B       |
| HZY2228 | W303 MAT $\alpha$ <i>mif2-2A-TAF::HisMX (S228A, S229A)</i>                                                               | Fig. S5B       |
| HZY2072 | W303 MAT $\alpha$ <i>mif2-3A-TAF::HisMX, 3A (S226A, S228A, S229A)</i>                                                    | Fig. S5B       |
| HZY2154 | W303 MAT $\alpha$ <i>mif2-5A-TAF::HisMX, 5A (S232A, S234A, S236A, S238A, S240A)</i>                                      | Fig. 5C, S5B-C |
| HZY1437 | W303 MAT $\alpha$ <i>mif2-10A-TAF::HisMX, 10A (S217A, S226A, S228A, S229A, S232A, S234A, S236A, S238A, S240A, T245A)</i> | Fig. S5B       |
| HZY1176 | W303 MAT $\alpha$ <i>MIF2-TAF:HisMX6 mcm21Δ:Hygro</i>                                                                    | Fig. 5C, S5B-C |
| HZY2245 | W303 MAT $\alpha$ <i>mif2-S226A -TAF:HisMX6 mcm21Δ:Hygro</i>                                                             | Fig. S5B       |
| HZY2247 | W303 MAT $\alpha$ <i>mif2-2A-TAF:HisMX6 mcm21Δ:Hygro</i>                                                                 | Fig. S5B       |
| HZY2102 | W303 MAT $\alpha$ <i>mif2-3A-TAF:HisMX6 mcm21Δ:Hygro</i>                                                                 | Fig. S5B       |
| HZY2208 | W303 MAT $\alpha$ <i>mif2-5A-TAF:HisMX6 mcm21Δ:Hygro</i>                                                                 | Fig. 5C, S5B-C |

**Table S2 – Yeast strains used in this study. Related to figures 1, 4-5 as indicated.**
